# Supplementary material
Source: MDPI journal article supplement (https://www.mdpi.com/2076-3417/11/15/6945)
Supplement: s1 [file s1 › applsci-1298158-supplementary.pdf]

## *Supporting Information*

### **Biohydrogel Based on Dynamic Covalent Bonds for Wound Healing Applications**

Chukwuma O. Agubata , Cynthia C. Mbaaji , Ifeanyi T. Nzekwe , César Saldías and David  
Díaz Díaz

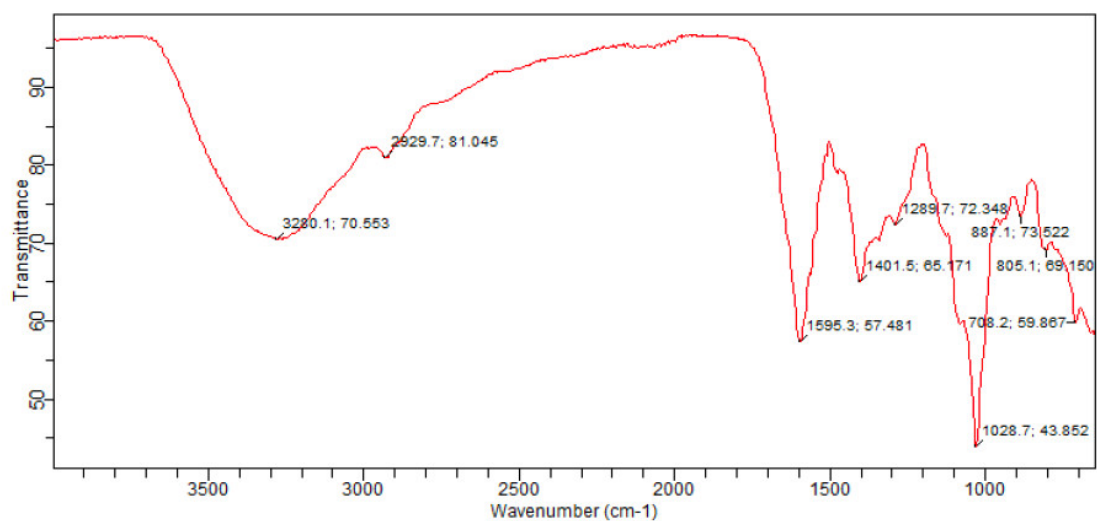

**Figure S1.** FTIR spectrum of phenylboronic acid-alginate (PBA-Alg) complex.

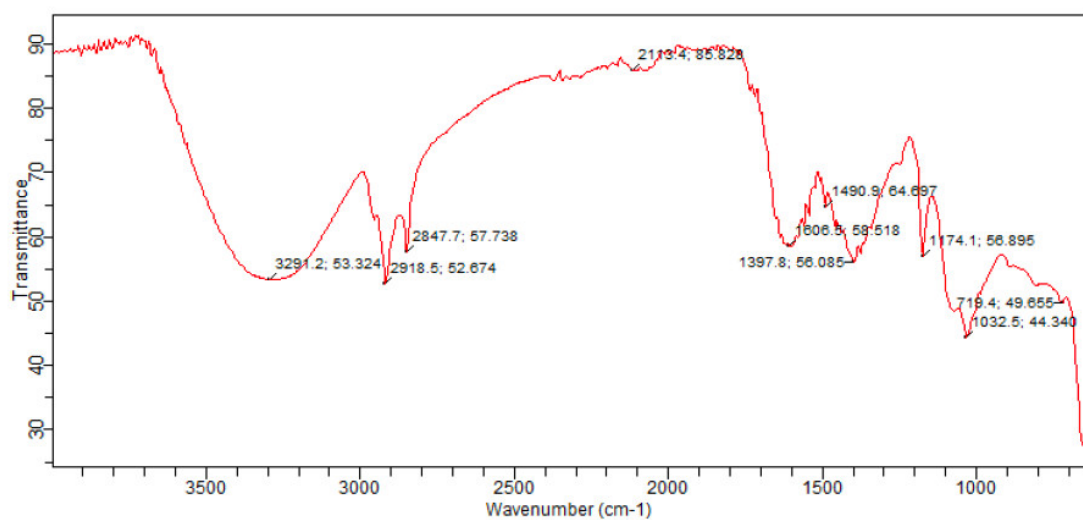

**Figure S2.** FTIR spectrum of acid-soluble collagen.

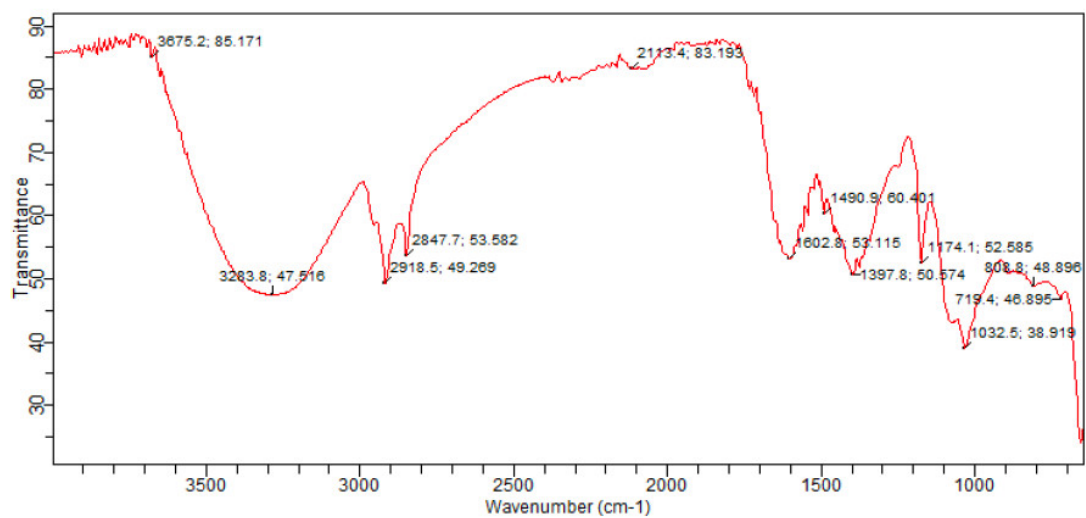

**Figure S3.** FTIR spectrum of PBA-Alg complex / collagen mixture.
